# Supplementary material for: A novel fluorescent turn-on biosensor based on QDs@GSH–GO fluorescence resonance energy transfer for sensitive glutathione S-transferase sensing and cellular imaging
Source: Royal Society of Chemistry journal article supplement (doi:10.1039/c6nr09944k), 2017-01-01
Supplement: c6nr09944k1.pdf [file c6nr09944k1.pdf]

## Electronic Supplementary Information

### **A novel fluorescent turn-on biosensor based on QDs@GSH-GO fluorescence resonance energy transfer for sensitive glutathione S-transferases sensing and cellular imaging**

**Lifang Chang<sup>a</sup>, Xiwen He<sup>a</sup>, Langxing Chen<sup>\*a,b</sup>, and Yukui Zhang<sup>a,c</sup>**

<sup>a</sup>Research Center for Analytical Sciences, College of Chemistry, Tianjin Key Laboratory of Biosensing and Molecular Recognition, State Key Laboratory of Medicinal Chemical Biology, Nankai University, Tianjin 300071, China.

<sup>b</sup>Collaborative Innovation Center of Chemical Science and Engineering (Tianjin), Tianjin 300071, China.

<sup>c</sup>Dalian Institute of Chemical Physics, Chinese Academy of Sciences, Dalian, 116023, China..

\*Fax: +86-0-22-23502458; E-mail: [lxchen@nankai.edu.cn](mailto:lxchen@nankai.edu.cn).

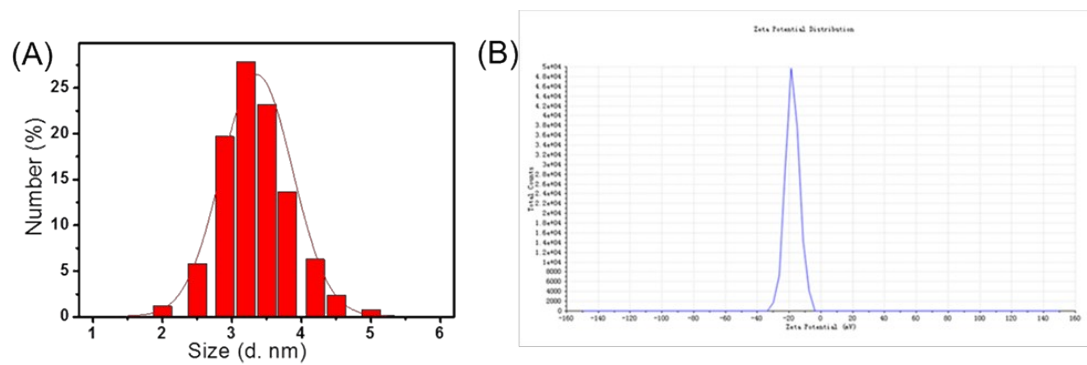

**Fig. S1** The statistics of Mn-doped ZnS QDs diameters (A) and the zeta potential (B).

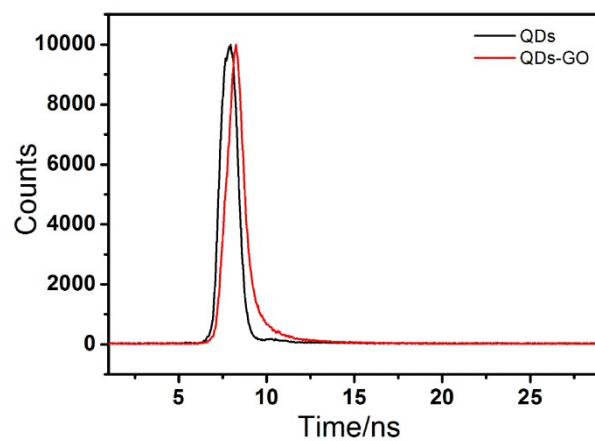

**Fig. S2** The decay curves of QDs (black line) and QDs-GO (red line) at 607 nm emission.

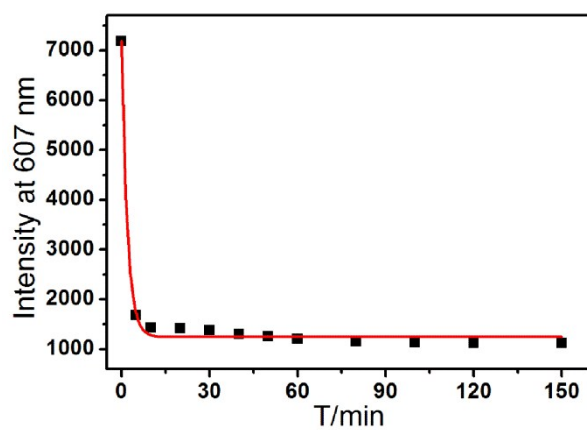

**Fig. S3** Effect of the interaction time between QDs@GSH and GO on the fluorescence intensity. The concentrations of the QDs@GSH and GO were  $50 \text{ mg L}^{-1}$  and  $0.24 \text{ mg mL}^{-1}$ , respectively.

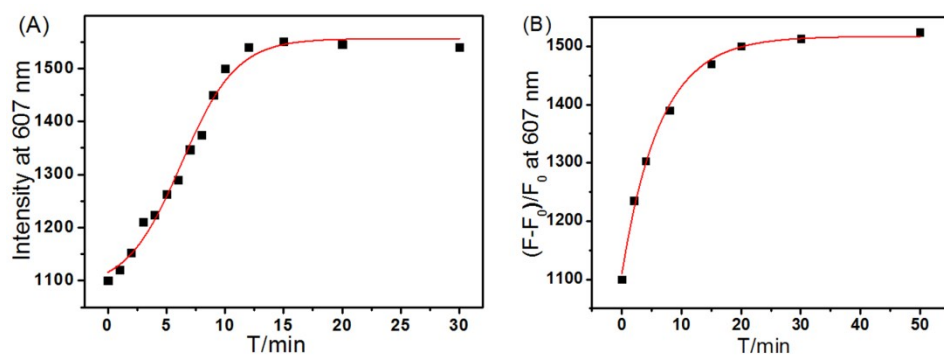

**Fig. S4** Plot of fluorescence emissions (607 nm) against interaction time of the QDs-GO system in the presence of 100 nM GST (A) and 1 nM ATP6V1F (B) in 10 mM PBS (pH = 7.4).

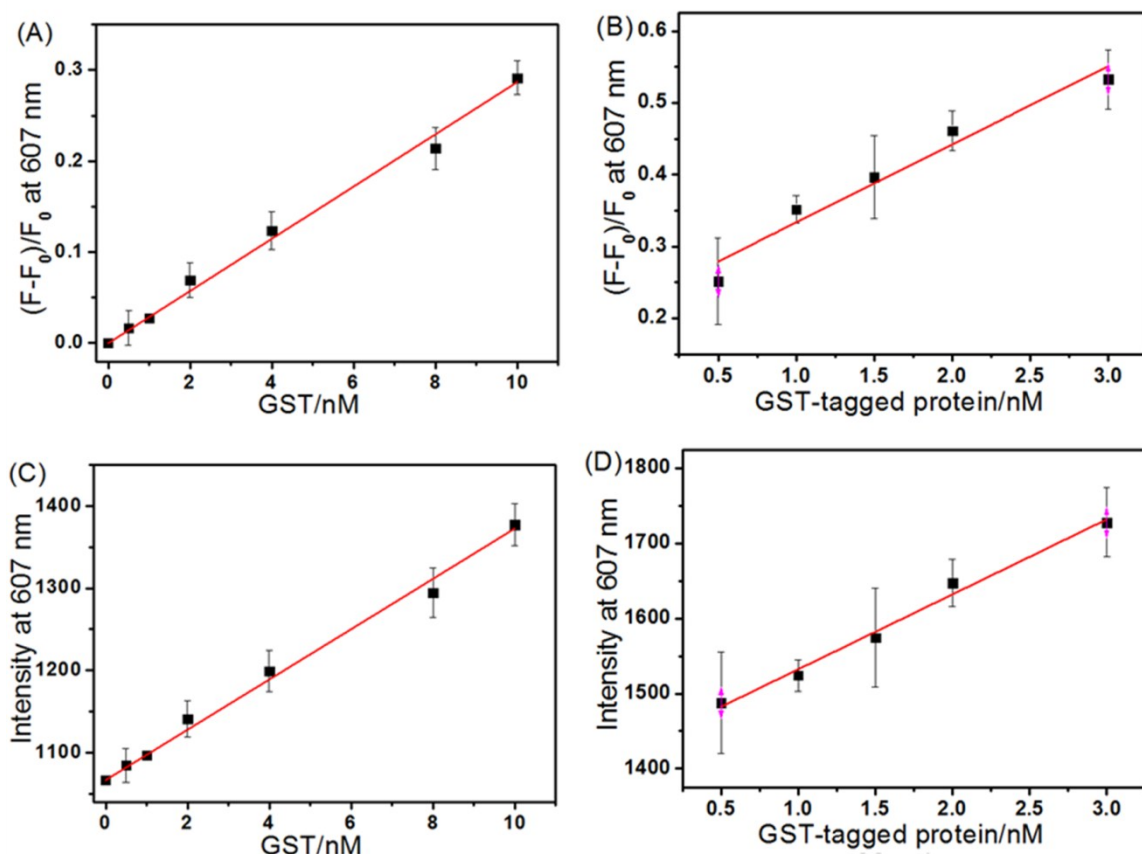

**Fig. S5** Linear relationships between the fluorescence intensity and the concentrations of GST in the range of 0.0-10.0 nM ( $R = 0.996$ ) (A) and ATP6V1F in the range of 0.5-3.0 nM ( $R = 0.990$ ) (B). The error bars represented the standard deviations of three independent experiments. (C) Fluorescence emission at 607 nm for the QDs@GSH-GO system at different concentrations of GST (0, 0.5, 1.0, 2.0, 4.0, 8.0, 10 nM) added. A linear range of GST could be obtained in the 0.0-10.0 nM ( $y = 1066.5 + 30.6x$ ,  $R = 0.996$ ). (D) Fluorescence emission at 607 nm for the QDs@GSH-GO system at different concentrations of ATP6V1F (0.5, 1.0, 1.5, 2.0, 3.0 nM) added. A linear range of ATP6V1F could be obtained in the 0.5-3.0 nM ( $y = 1442.2 + 88.5x$ ,  $R = 0.990$ ). The detection limits of the QDs-GO system for both GST and ATP6V1F were then measured to be  $2.1 \times 10^{-10}$  M and  $0.72 \times 10^{-10}$  M, respectively. The values were calculated with the equation: detection limit =  $3\sigma/m$ , where  $\sigma$  is the standard deviation of blank measurement ( $\sigma = 2.12$ , derived from nine measurements (1112, 1116, 1115, 1114, 1118, 1115, 1116, 1114, 1111)),  $m$  is the slope between intensity versus sample concentration.

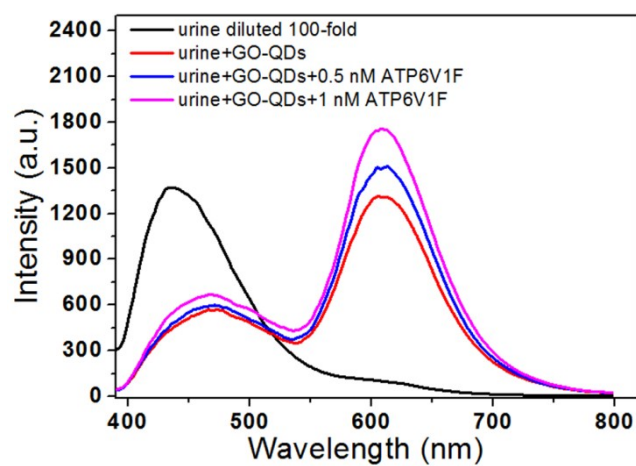

**Fig. S6** Fluorescence spectra of urine sample (black), QDs@GSH-GO adding into urine sample (red), QDs@GSH-GO adding into urine sample spiked 0.5 nM ATP6V1F (blue) and 1.0 nMATP6V1F (pink). All urine samples conducted in this experiment were diluted by 100-fold with 10 mM PBS buffer (pH = 7.4).

Table S1 The lifetimes of QDs and QDs-GO FRET system

|        | $\chi^2$ | $\tau_1$ (ns) | Rel%  | $\tau_2$ (ns) | Rel%  | $\tau$ (ns) |
|--------|----------|---------------|-------|---------------|-------|-------------|
| QDs    | 1.217    | 0.1337        | 15.26 | 2.1872        | 84.74 | 1.87        |
| QDs-GO | 1.157    | 0.5133        | 47.98 | 2.1863        | 52.02 | 1.38        |

$\chi^2$  is defined as a coefficient;  $\tau_1$  and  $\tau_2$  stand for the two different lifetimes of the QDs, respectively; Rel% is the relative amount of the two lifetimes;  $\tau$  is the average lifetime.
